# Supplementary material for: A Recent SARS-CoV-2 Infection Enhances Antibody-Dependent Cellular Cytotoxicity against Several Omicron Subvariants following a Fourth mRNA Vaccine Dose
Source: MDPI journal article supplement (doi:10.3390/v15061274), 2023-05-29
Supplement: s1 [file s1]

**Supplemental Table S1. List of mutations of the Omicron variants studied**

| Variant   | Mutations                                                                                                                                                                                                                                       |
|-----------|-------------------------------------------------------------------------------------------------------------------------------------------------------------------------------------------------------------------------------------------------|
| D614G     | D614G                                                                                                                                                                                                                                           |
| BA.1      | A67V, Δ69-70, T95I, G142D/Δ143-145, Δ211/L212I, ins214EPE, G339D, S371L, S373P, S375F, K417N, N440K, G446S, S477N, T478K, E484A, Q493R, G496S, Q498R, N501Y, Y505H, T547K, D614G, H655Y, N679K, P681H, N764K, D796Y, N856K, Q954H, N969K, L981F |
| BA.2      | T19I, L24S, Δ25-27, G142D, V213G, G339D, S371F, S373P, S375F, T376A, D405N, R408S, K417N, N440K, S477N, T478K, E484A, Q493R, Q498R, N501Y, Y505H, D614G, H655Y, N679K, P681H, N764K, D796Y, Q954H, N969K                                        |
| BA.2.12.1 | T19I, LPPA24S, G142D, V213G, G339D, S371F, S373P, S375F, T376A, D405N, R408S, K417N, N440K, L452Q, S477N, T478K, E484A, Q493R, Q498R, N501Y, Y505H, D614G, H655Y, N679K, P681H, S704L, N764K, D796Y, Q954H, N969K                               |
| BA.4/5    | T19I, LPPA24S, Δ69-70, G142D, V213G, G339D, S371F, S373P, S375F, T376A, D405N, R408S, K417N, N440K, L452R, S477N, T478K, E484A, F486V, Q498R, N501Y, Y505H, D614G, H655Y, N679K, P681H, N764K, D796Y, Q954H, N969K                              |

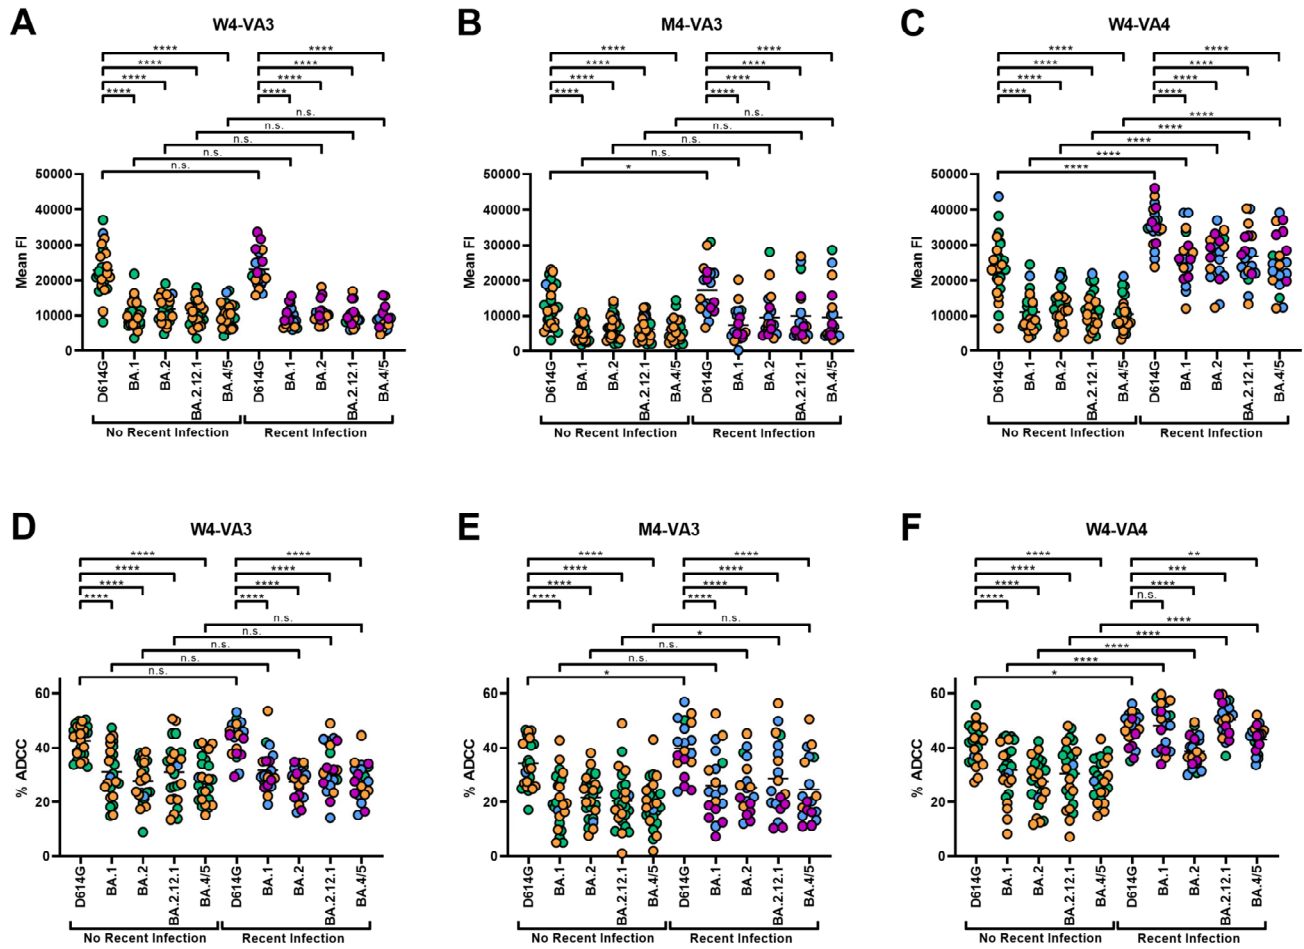

**Supplemental Figure S1. Comparison between antibody binding and ADCC between the D614G Spike and the Omicron subvariant Spikes at each timepoint.** Antibody binding on the D614G, BA.1, BA.2, BA.2.12.1 and BA.4/5 Spikes of the plasmas of non-recently infected individuals and recently infected individuals at (A) 4 weeks following the third dose, (B) 4 months following the third dose and (C) 4 weeks following the fourth dose. ADCC capacity against D614G, BA.1, BA.2, BA.2.12.1 and BA.4/5 Spike expressing cells of the plasmas of non-recently infected individuals and recently infected individuals at (D) 4 weeks following the third dose, (E) 4 months following the third dose and (F) 4 weeks following the fourth dose. Circles filled with orange, green, purple or blue represent data points of individuals which received a fourth dose of Pfizer monovalent, Moderna monovalent, Pfizer bivalent or Moderna bivalent vaccine, respectively. Statistical significance between groups (unpaired t-test or Mann-Whitney test) or within groups (paired t-test or Wilcoxon test) was evaluated using the appropriate parametric or non-parametric statistical test based on the normal distribution of the data (n.s. : non-significant; \* :  $p < 0.05$ ; \*\* :  $p < 0.01$ ; \*\*\* :  $p < 0.001$ ; \*\*\*\* :  $p < 0.0001$ ). Mean FI : Mean Fluorescence Intensity.

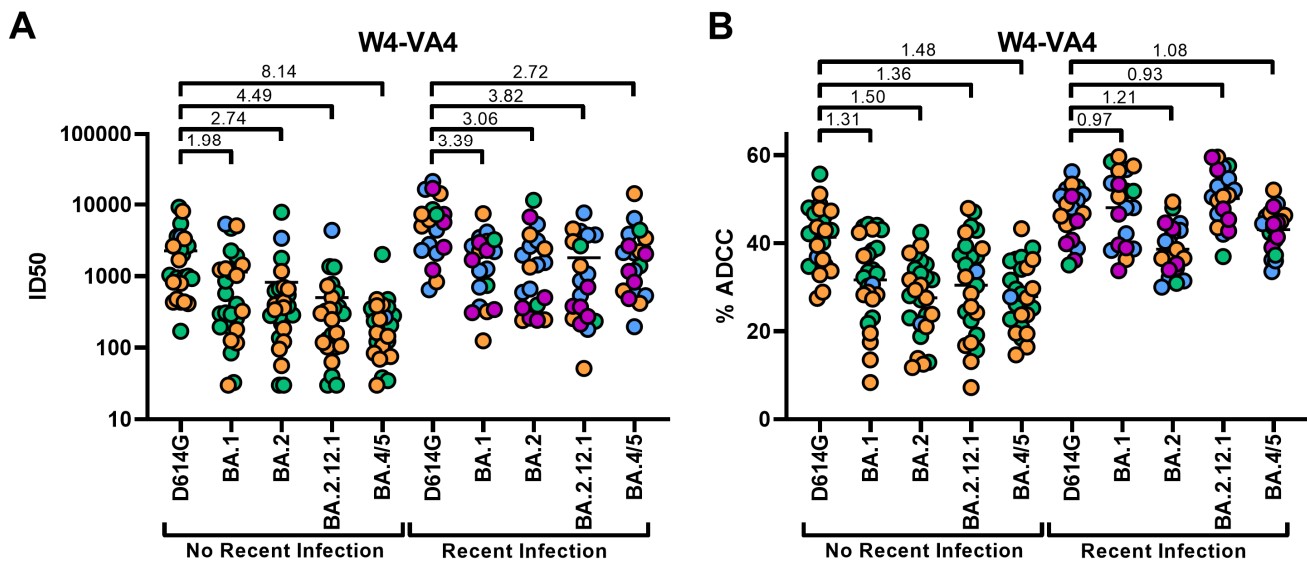

**Supplemental Figure S2. Fold decrease comparison (against D614G) between neutralization and ADCC after the fourth vaccine dose.** (A) Neutralization capacity of plasmas from non-recently and recently infected individuals tested against pseudoviruses bearing either the D614G, BA.1, BA.2, BA.2.12.1 or BA.4/5 Spike glycoproteins 4 weeks following the fourth dose. Neutralization half maximal inhibitory plasma dilution (ID<sub>50</sub>) values were determined using a normalized non-linear regression using GraphPad Prism software. (B) ADCC capacity against D614G, BA.1, BA.2, BA.2.12.1 and BA.4/5 Spike expressing cells of the plasmas of non-recently infected individuals and recently infected individuals at 4 weeks following the fourth dose. Circles filled with orange, green, purple or blue represent data points of individuals which received a fourth dose of Pfizer monovalent, Moderna monovalent, Pfizer bivalent or Moderna bivalent vaccine, respectively. Fold decreases comparison with the D614G Spike are noted in (A) and (B).
